# Supplementary material for: Development of weight and age-based dosing of daily primaquine for radical cure of vivax malaria
Source: PubMed Central journal article supplement (PMC8427859; doi:10.1186/s12936-021-03886-w), 2021-09-09
Supplement: 12936_2021_3886_MOESM1_ESM.pdf [file 12936_2021_3886_MOESM1_ESM.pdf]

**Appendix 1: Primaquine regimens for radical cure of *P. vivax* malaria, used in studies and recommended by malaria control programs**

**Best Primaquine dose study [1].**

For children

| Weight (Kg) | mL     | Dose in mg | mg/kg dose | total mg/kg dose in 14 d |
|-------------|--------|------------|------------|--------------------------|
| 5           | 0.8 ml | 2.4        | 0.48       | 6.72                     |
| 6           | 1.0 ml | 3          | 0.5        | 7                        |
| 7           | 1.2 ml | 3.6        | 0.51       | 7.2                      |
| 8           | 1.3 ml | 3.9        | 0.49       | 6.83                     |
| 9           | 1.5 ml | 4.5        | 0.5        | 7                        |
| 10          | 1.7 ml | 5.1        | 0.51       | 7.14                     |
| 11          | 1.8 ml | 5.4        | 0.49       | 6.87                     |
| 12          | 2 ml   | 6          | 0.5        | 7                        |
| 13          | 2.2 ml | 6.6        | 0.51       | 7.11                     |
| 14          | 2.3 ml | 6.9        | 0.49       | 6.9                      |
| 15          | 2.5 ml | 7.5        | 0.5        | 7                        |
| 16          | 2.5 ml | 7.5        | 0.47       | 6.56                     |
| 17          | 2.5 ml | 7.5        | 0.44       | 6.18                     |
| 18          | 3 ml   | 9          | 0.5        | 7                        |
| 19          | 3 ml   | 9          | 0.47       | 6.63                     |
| 20          | 3 ml   | 9          | 0.45       | 6.3                      |

*Each tablet contains 15 mg. Dose: (0.5 mg/kg/day) for 14 days. A suspension is made by allowing 1 tablet to dissolve in 5ml clean water (1ml=3mg)*

For adults

| Weight (Kg) | N tabs | Dose in mg | mg/kg dose  | total mg dose in 14 d |
|-------------|--------|------------|-------------|-----------------------|
| 21 - 26     | 0.75   | 11.25      | 0.43 - 0.54 | 6.06 - 7.5            |
| 27 - 34     | 1      | 15         | 0.44 - 0.56 | 6.18 - 7.78           |
| 35 - 40     | 1.25   | 18.75      | 0.47 - 0.54 | 6.56 - 7.5            |
| 41 - 48     | 1.5    | 22.5       | 0.47 - 0.55 | 6.56 - 7.68           |
| 49 - 56     | 1.75   | 26.25      | 0.47 - 0.54 | 6.56 - 7.5            |
| 57 - 65     | 2      | 30         | 0.46 - 0.53 | 6.46 - 7.37           |
| 66 - 80     | 2.5    | 37.5       | 0.47 - 0.57 | 6.56 - 7.95           |
| 81 - 100    | 3      | 45         | 0.45 - 0.56 | 6.3 - 7.78            |

## IMPROV study regimen [2]

| Weight/kg | 0.5 mg/kg/day regimen       | mg/kg/day   | Total dose in mg/kg in 14 days | 1 mg/kg/day regimen | mg/kg/day  | Total dose in mg/kg in 7 days |
|-----------|-----------------------------|-------------|--------------------------------|---------------------|------------|-------------------------------|
| 5 to 22   | see suspension dosing chart |             |                                |                     |            |                               |
| 23-34     | 15                          | 0.44 - 0.65 | 6.2 - 9.1                      | 30                  | 0.88 - 1.3 | 6.2 - 9.1                     |
| 35-45     | 22.5                        | 0.5 - 0.64  | 7.0 - 9.0                      | 45                  | 1 - 1.29   | 7.0 - 9.0                     |
| ≥ 46      | 30                          | ≤ 0.67      | ≤ 9.4                          | 60                  | ≤ 1.33     | ≤ 9.4                         |

Primaquine suspension dosing chart.

A primaquine tablet is crushed and suspended.

1) For children randomised to receive 14 days primaquine provide 3 mg PQ in 1ml suspension (e.g. one 15mg tablet in 5ml syrup → 1ml=3mg).

1ml=3mg

| Weight | ml/day | Actual dose given (mg) | Actual dose given mg/kg/day | Total mg/kg dose in 14 days |
|--------|--------|------------------------|-----------------------------|-----------------------------|
| 5      | 0.8    | 2.4                    | 0.48                        | 6.72                        |
| 6      | 1      | 3                      | 0.5                         | 7                           |
| 7      | 1.2    | 3.6                    | 0.51                        | 7.2                         |
| 8      | 1.3    | 3.9                    | 0.49                        | 6.83                        |
| 9      | 1.5    | 4.5                    | 0.5                         | 7                           |
| 10     | 1.7    | 5.1                    | 0.51                        | 7.14                        |
| 11     | 1.8    | 5.4                    | 0.49                        | 6.87                        |
| 12     | 2      | 6                      | 0.5                         | 7                           |
| 13     | 2.2    | 6.6                    | 0.51                        | 7.11                        |
| 14     | 2.3    | 6.9                    | 0.49                        | 6.9                         |
| 15     | 2.5    | 7.5                    | 0.5                         | 7                           |
| 16     | 2.5    | 7.5                    | 0.47                        | 6.56                        |
| 17     | 3      | 9                      | 0.53                        | 7.4                         |
| 18     | 3      | 9                      | 0.5                         | 7                           |
| 19     | 3      | 9                      | 0.47                        | 6.63                        |
| 20     | 3      | 9                      | 0.45                        | 6.3                         |
| 21     | 3.5    | 10.5                   | 0.5                         | 7                           |
| 22     | 3.5    | 10.5                   | 0.48                        | 6.68                        |

2) For children randomised to receive **7 days primaquine** provide 6mg PQ in 1ml suspension (e.g. two 15mg tablets in 5ml syrup → 1ml=6mg, based on the properties of the primaquine tablets other concentrations may need to be explored).

1ml=6mg

| Weight | ml/day | Actual dose given (mg) | Actual dose given mg/kg/day | Total mg/kg dose in 7 days |
|--------|--------|------------------------|-----------------------------|----------------------------|
| 5      | 0.8    | 4.8                    | 0.96                        | 6.72                       |
| 6      | 1      | 6                      | 1                           | 7                          |
| 7      | 1.2    | 7.2                    | 1.03                        | 7.2                        |
| 8      | 1.3    | 7.8                    | 0.98                        | 6.83                       |
| 9      | 1.5    | 9                      | 1                           | 7                          |
| 10     | 1.7    | 10.2                   | 1.02                        | 7.14                       |
| 11     | 1.8    | 10.8                   | 0.98                        | 6.87                       |
| 12     | 2      | 12                     | 1                           | 7                          |
| 13     | 2.2    | 13.2                   | 1.02                        | 7.11                       |
| 14     | 2.3    | 13.8                   | 0.99                        | 6.9                        |
| 15     | 2.5    | 15                     | 1                           | 7                          |
| 16     | 2.5    | 15                     | 0.94                        | 6.56                       |
| 17     | 3      | 18                     | 1.06                        | 7.41                       |
| 18     | 3      | 18                     | 1                           | 7                          |
| 19     | 3      | 18                     | 0.95                        | 6.63                       |
| 20     | 3      | 18                     | 0.9                         | 6.3                        |
| 21     | 3.5    | 21                     | 1                           | 7                          |
| 22     | 3.5    | 21                     | 0.95                        | 6.68                       |

**Regimen used by Wagchuch et al in Bhutan [3].**

| <b>Body weight</b> | <b>Dose given / day in mg</b> | <b>mg/kg/day</b> | <b>total dose in mg/kg in 14 days</b> |
|--------------------|-------------------------------|------------------|---------------------------------------|
| 5 - 14             | 2.5                           | 0.18 - 0.5       | 2.52- 7                               |
| 15 - 24            | 5                             | 0.16 - 0.25      | 2.24 - 3.5                            |
| 25 - 34            | 15                            | 0.22 - 0.3       | 3.08 - 4.2                            |
| 35 - ≥ 60          | 30                            | ≤ 0.25 - 0.43    | 3.5 - 6.02                            |

**Regimen used by Takeuchi et al in Thailand [4].**

Patients were dosed by age. We have used our modelled weight for age growth curves to estimate the minimum and maximum weights for each age to estimate the mg/kg dose received.

| <b>Age</b> | <b>Weight kg</b> | <b>Dose mg</b> | <b>mg/kg/day</b> | <b>total dose in mg/kg in 14 days</b> |
|------------|------------------|----------------|------------------|---------------------------------------|
| 3 - 7      | 8.3 - 27         | 5              | 0.19 - 0.6       | 2.66 - 8.4                            |
| 8 - 13     | 15 - 49          | 10             | 0.2 - 0.67       | 2.8 - 9.38                            |
| ≥ 14       | 25 - 86          | 15             | 0.17 - 0.6       | 2.38 – 8.4                            |

## Vietnamese National Guidelines

<http://www.impe-qn.org.vn/impe-qn/vn/portal/InfoDetail.jsp?area=58&cat=1066&ID=1322>

The recommended regimen currently is 0.25 mg/kg/d for 14 days. Dosing is by age. We have used our modelled age growth curves to estimate the minimum and maximum weights for each age to estimate the mg/kg dose received.

| Age      | Weight kg  | Dose in mg | 7.5 mg tablets | mg/kg/day   | total dose in mg/kg in 14 days |
|----------|------------|------------|----------------|-------------|--------------------------------|
| 6m - <3  | 5 - 16.6   | 1.87       | ¼ tablet       | 0.11 - 0.38 | 1.54 - 5.32                    |
| 3 - <5   | 8.3 - 21.3 | 3.75       | ½ tablet       | 0.18 - 0.45 | 2.52 - 6.3                     |
| 5 - <12  | 11 - 42    | 7.5        | 1 tablet       | 0.18 - 0.68 | 2.5 - 9.52-                    |
| 12 - <15 | 22 - 53    | 11.25      | 1½ tablets     | 0.21 - 0.51 | 2.94 - 7.14                    |
| ≥ 15     | 27 - 86    | 15         | 2 tablets      | 0.17 - 0.56 | 2.38 - 7.84                    |

Between 2007 and 2009, 0.5 mg/kg/d was recommended for 10 days, for a total dose of 5 mg/kg. Dosing was by age. We have used our modelled weight for age growth curves to estimate the minimum and maximum weights for each age to estimate the mg/kg dose received.

| Age      | Weight kg  | Dose | 7.5 mg tablets | mg/kg/d     | total dose in 10 d |
|----------|------------|------|----------------|-------------|--------------------|
| 3 - <5   | 8.3 - 21.3 | 7.5  | 1              | 0.35 - 0.9  | 3.5 - 9            |
| 5 - <12  | 11 to 42   | 15   | 2              | 0.36 - 1.36 | 3.6 - 13.6         |
| 12 - <15 | 22 - 53    | 22.5 | 3              | 0.42 - 1.02 | 4.2 - 10.2         |
| ≥ 15     | 27 - 86    | 30   | 4              | 0.35 - 1.11 | 3.5 - 11.1         |

## Regimen recommended in Brazil in 2020 over 7 days

[http://bvsm.s.saude.gov.br/bvs/publicacoes/guia\\_pratico\\_malaria.pdf](http://bvsm.s.saude.gov.br/bvs/publicacoes/guia_pratico_malaria.pdf)

| TABELA 2 – Tratamento de malária por <i>P. vivax</i> ou <i>P. ovale</i> – <b>OPÇÃO 2</b> |                |  |             |  |             |  |                |                |                |                |
|------------------------------------------------------------------------------------------|----------------|--|-------------|--|-------------|--|----------------|----------------|----------------|----------------|
| IDADE/PESO                                                                               | DIA 1          |  | DIA 2       |  | DIA 3       |  | DIA 4          | DIA 5          | DIA 6          | DIA 7          |
| <6 meses<br><5Kg                                                                         | 25<br>50       |  | 25<br>50    |  | 25<br>50    |  |                |                |                |                |
| 6-11 meses<br>5-9Kg                                                                      | 25<br>50       |  | 25<br>50    |  | 25<br>50    |  | 5              | 5              | 5              | 5              |
| 1-3 anos<br>10-14Kg                                                                      | CQ             |  | CQ          |  | CQ          |  | 5 5            | 5 5            | 5 5            | 5 5            |
| 4-8 anos<br>15-24Kg                                                                      | CQ CQ          |  | CQ          |  | CQ          |  | 15             | 15             | 15             | 15             |
| 9-11 anos<br>25-34Kg                                                                     | CQ CQ          |  | CQ CQ       |  | CQ CQ       |  | 15             | 15             | 15             | 15             |
| 12-14 anos<br>35-49Kg                                                                    | CQ CQ<br>CQ    |  | CQ CQ<br>CQ |  | CQ CQ<br>CQ |  | 15 15          | 15 15          | 15 15          | 15 15          |
| >15 anos<br>50-69Kg                                                                      | CQ CQ<br>CQ CQ |  | CQ CQ<br>CQ |  | CQ CQ<br>CQ |  | 15 15          | 15 15          | 15 15          | 15 15          |
| 70-89Kg                                                                                  | CQ CQ<br>CQ CQ |  | CQ CQ<br>CQ |  | CQ CQ<br>CQ |  | 15 15<br>15    | 15 15<br>15    | 15 15<br>15    | 15 15<br>15    |
| 90-120Kg                                                                                 | CQ CQ<br>CQ CQ |  | CQ CQ<br>CQ |  | CQ CQ<br>CQ |  | 15 15<br>15 15 | 15 15<br>15 15 | 15 15<br>15 15 | 15 15<br>15 15 |

CQ Cloroquina 150 mg    25/50 Artesunato 25 mg + Mefloquina 50 mg    5 Primaquina 5 mg    15 Primaquina 15 mg

**IMPORTANTE:** • Gestantes, puérperas até um mês de lactação e crianças menores de 6 meses não podem usar a primaquina. • Pacientes que pesem mais de 120 kg (não contemplados nessa tabela) devem ter sua dose de primaquina calculada pelo peso. • Caso surja urina escura, icterícia, pele e olhos amarelos, tontura ou falta de ar, buscar urgentemente auxílio médico. • Sempre que possível, supervisionar o tratamento. • Administrar os medicamentos preferencialmente após as refeições.

| Weight kg | Dose in mg/d | mg/kg/d     | total dose in mg/kg in 7 days |
|-----------|--------------|-------------|-------------------------------|
| 5 - 9     | 5            | 0.56 - 1.0  | 3.89 - 7                      |
| 10 - 14   | 10           | 0.71 - 0.94 | 5 to 7                        |
| 15 - 34   | 15           | 0.44 - 1.0  | 3.09 - 7                      |
| 35 - 49   | 30           | 0.61 - 0.86 | 4.29 - 6                      |
| 50 - 69   | 30           | 0.43 - 0.75 | 3.04 - 4.2                    |
| 70 - 89   | 45           | 0.51 - 0.64 | 3.54 - 4.5                    |
| 90-120    | 60           | 0.5 - 0.67  | 3.5 - 4.67                    |

## Previous regimen in Brazil in children [5]

| Age in y | Weight kg | Total dose over 7d mg | Mg/kg total dose in 7 days |
|----------|-----------|-----------------------|----------------------------|
| 1 - 3    | 10 to 14  | 40                    | 2.86 - 4.0                 |
| 4 - 8    | 15 to 24  | 70                    | 2.92 - 4.67                |
| 9 - 11   | 25 - 34   | 105                   | 3.09 - 4.2                 |
| 12 - 14  | 35 - 49   | 150                   | 3.06 - 4.2                 |

## Regimen used in Colombia

[https://www.paho.org/col/index.php?option=com\\_docman&view=document&layout=default&alias=1220-guia-para-la-atencion-clinica-integral-del-paciente-con-malaria&category\\_slug=publicaciones-ops-oms-colombia&Itemid=688](https://www.paho.org/col/index.php?option=com_docman&view=document&layout=default&alias=1220-guia-para-la-atencion-clinica-integral-del-paciente-con-malaria&category_slug=publicaciones-ops-oms-colombia&Itemid=688)

| Edad/<br>peso          | Número de tabletas por medicamento por día |                    |                     |                    |                     |                    |                |
|------------------------|--------------------------------------------|--------------------|---------------------|--------------------|---------------------|--------------------|----------------|
|                        | 1 <sup>er</sup> día                        |                    | 2 <sup>do</sup> día |                    | 3 <sup>er</sup> día |                    | 4-14           |
|                        | CQ                                         | PQ                 | CQ                  | PQ                 | CQ                  | PQ                 | PQ             |
| 6-11 m<br>5-9 kg       | 1/2                                        | *                  | 1/4                 | *                  | 1/4                 | *                  | *              |
| 1-3 años<br>10-14 kg   | 1                                          | 1*<br>Tab5<br>mg   | 1/2                 | 1/2*<br>Tab5<br>mg | 1/2                 | 1/2*<br>Tab5<br>mg | 1/2*<br>Tab5mg |
| 4-8 años<br>15-24 kg   | 1                                          | 1<br>Tab5<br>mg    | 1                   | 1<br>Tab5<br>mg    | 1                   | 1<br>Tab5<br>mg    | 1<br>Tab5mg    |
| 9 -11 años<br>25-34 kg | 2                                          | 1/2<br>Tab1<br>5mg | 2                   | 1/2<br>Tab1<br>5mg | 2                   | 1/2<br>Tab1<br>5mg | 1/2<br>Tab15mg |
| 12-14años<br>35-49 kg  | 3                                          | 1<br>Tab1<br>5mg   | 2                   | 1<br>Tab1<br>5mg   | 2                   | 1<br>Tab1<br>5mg   | 1/2<br>Tab15mg |
| > 15 años<br>>50 kg    | 4                                          | 1<br>Tab1<br>5mg   | 3                   | 1<br>Tab1<br>5mg   | 3                   | 1<br>Tab1<br>5mg   | 1<br>Tab15mg   |

\*No administrar en menores de 2 años

## Regimen used in Honduras

<http://www.bvs.hn/Honduras/salud/norma.de.malaria.en.honduras.pdf>

### Anexo 1: Tratamiento de la Malaria con Medicamentos de Primera Línea

#### Cuadro 1

#### Tratamiento de la Malaria No Complicada por *Plasmodium vivax* y *Plasmodium ovale*

| Grupo de Edad              | N° comprimidos de Cloroquina. 150 mg |       |       | N° de comprimidos de Primaquina por 14 días |             |
|----------------------------|--------------------------------------|-------|-------|---------------------------------------------|-------------|
|                            | Día 1                                | Día 2 | Día 3 | 5 mg                                        | 15 mg       |
| < 6 meses<br>(<6Kg)        | ½                                    | ¼     | ¼     |                                             |             |
| 6 – 11 meses<br>(6-10 kg)  | ½                                    | ½     | ½     | ½ (2.5mg.)                                  |             |
| 1 - 2 años<br>(10 -14 kg)  | 1                                    | 1     | 0.5   | ½ (2.5mg.)                                  |             |
| 3 a 4 años (15-<br>18 kg)  | 1                                    | 1     | 1     | 1 (5 mg.)                                   |             |
| 5 a 7 años<br>(19 – 24 kg) | 1.5                                  | 1.5   | 1     | 1 (5 mg.)                                   |             |
| 8 – 10 años<br>(25 -36 Kg) | 2.5                                  | 2.5   | 1     | 0                                           | ½ (7.5 mg.) |
| 11 – 13 años<br>(37-48 Kg) | 3                                    | 3     | 2     | 0                                           | 1 (15 mg.)  |
| 14 y más años<br>(>49 kg)  | 4                                    | 3     | 3     | 0                                           | 1 (15 mg.)  |



## Regimen used in Ethiopia

### Annex F. Primaquine phosphate dose: 0.25 mg base per kg daily schedule for 14 days for *P. vivax*

| Weight (kg) | Age (years)       | Number of tablets per day for 14 days |              |
|-------------|-------------------|---------------------------------------|--------------|
|             |                   | 7.5 mg tablet                         | 15 mg tablet |
| 8-14        | 7months – 3 years | ½ tab                                 | -            |
| 15 -18      | 4 – 5 years       | ½ tab                                 | -            |
| 19 – 24     | 5 – 7 years       | ¾                                     | -            |
| 25 – 35     | 8 – 10 years      | 1                                     | ½            |
| 36 – 50     | 11 – 13 years     | 1 ½                                   | 1            |
| 50+         | 14+ years         | 2                                     | 1.5          |

## References

1. Chu CS, Phyo AP, Turner C, Win HH, Poe NP, Yotypingaphiram W, Thinraow S, Wilairisak P, Raksapraidee R, Carrara VI *et al*: **Chloroquine Versus Dihydroartemisinin-Piperaquine With Standard High-dose Primaquine Given Either for 7 Days or 14 Days in Plasmodium vivax Malaria**. *Clinical infectious diseases : an official publication of the Infectious Diseases Society of America* 2019, **68**(8):1311-1319.
2. Taylor WRJ, Thriemer K, von Seidlein L, Yuentrakul P, Assawariyathipat T, Assefa A, Auburn S, Chand K, Chau NH, Cheah PY *et al*: **Short-course primaquine for the radical cure of Plasmodium vivax malaria: a multicentre, randomised, placebo-controlled non-inferiority trial**. *Lancet* 2019.
3. Wangchuk S, Drukpa T, Penjor K, Peldon T, Dorjey Y, Dorji K, Chhetri V, Trimarsanto H, To S, Murphy A *et al*: **Where chloroquine still works: the genetic make-up and susceptibility of Plasmodium vivax to chloroquine plus primaquine in Bhutan**. *Malar J* 2016, **15**(1):277.
4. Takeuchi R, Lawpoolsri S, Imwong M, Kobayashi J, Kaewkungwal J, Pukrittayakamee S, Puangsa-art S, Thanyavanich N, Maneeboonyang W, Day NP *et al*: **Directly-observed therapy (DOT) for the radical 14-day primaquine treatment of Plasmodium vivax malaria on the Thai-Myanmar border**. *Malar J* 2010, **9**:308.
5. Vieira M, Matos Lopes TR, Mello A, de Sena LWP, Commons RJ, Vieira JLF: **Doses of primaquine administered to children with Plasmodium vivax according to an age-based dose regimen**. *Pathog Glob Health* 2020, **114**(7):388-392.
