# Supplementary material for: Development of weight and age-based dosing of daily primaquine for radical cure of vivax malaria
Source: PubMed Central journal article supplement (PMC8427859; doi:10.1186/s12936-021-03886-w), 2021-09-09

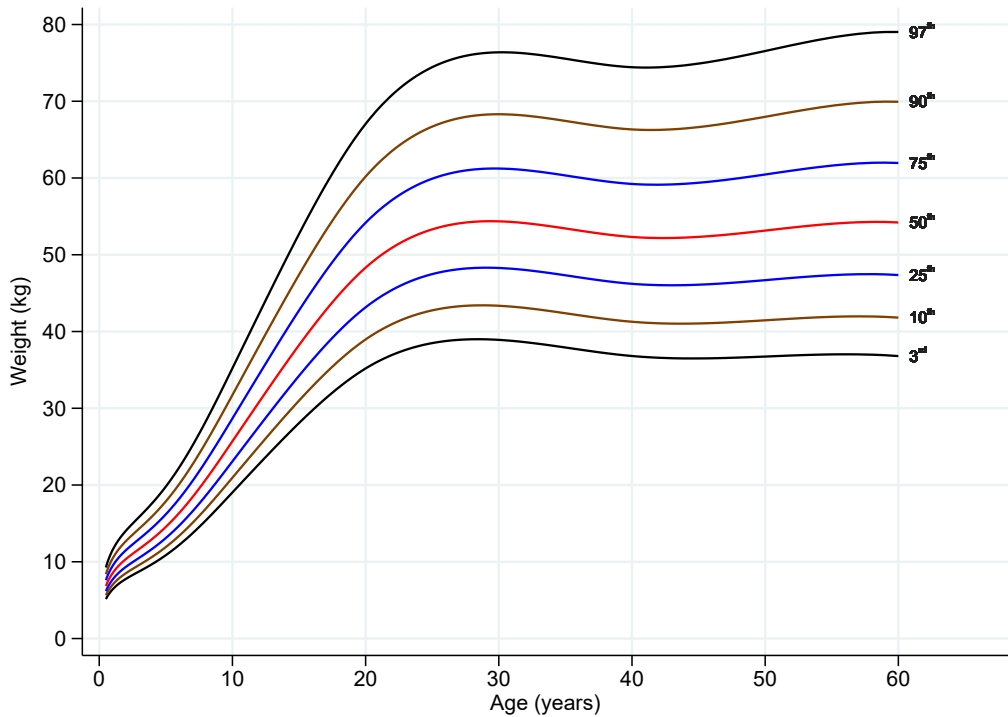

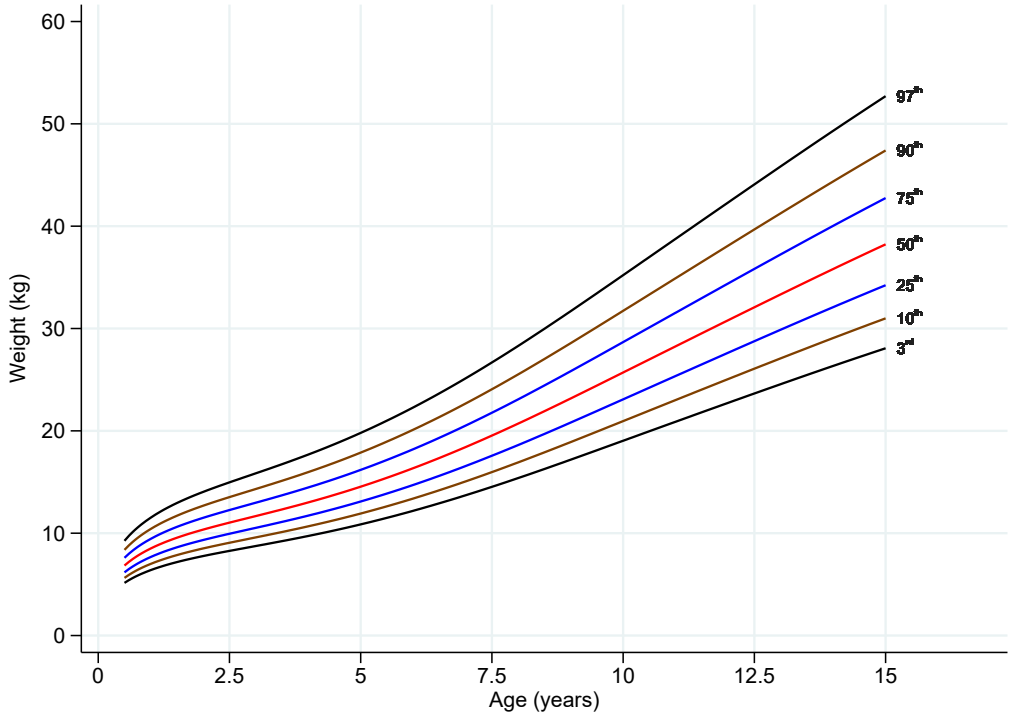

Supplement: 12936_2021_3886_MOESM2_ESM.pdf [file 12936_2021_3886_MOESM2_ESM.pdf]
