# Supplementary material for: Development of weight and age-based dosing of daily primaquine for radical cure of vivax malaria
Source: PubMed Central journal article supplement (PMC8427859; doi:10.1186/s12936-021-03886-w), 2021-09-09
Supplement: 12936_2021_3886_MOESM5_ESM.pdf [file 12936_2021_3886_MOESM5_ESM.pdf]

Table S2. Detailed breakdown of the mg/kg/day dose of primaquine individuals are predicted to receive as a function of age.

| Age band (years) | N     | Dose (mg) | Dose (mg/kg/day) |      |      |      |      |      |      |
|------------------|-------|-----------|------------------|------|------|------|------|------|------|
|                  |       |           | Min              | P5   | P25  | P50  | P75  | P95  | Max  |
| <1*              | 1063  | 5         | 0.43             | 0.52 | 0.6  | 0.65 | 0.71 | 0.81 | 1    |
| 1                | 2352  | 7.5       | 0.55             | 0.66 | 0.75 | 0.82 | 0.9  | 1.04 | 1.25 |
| 2                | 2426  | 7.5       | 0.45             | 0.55 | 0.63 | 0.69 | 0.75 | 0.85 | 1.03 |
| 3                | 2490  | 7.5       | 0.4              | 0.49 | 0.56 | 0.6  | 0.65 | 0.75 | 0.91 |
| 4                | 2462  | 7.5       | 0.36             | 0.44 | 0.5  | 0.54 | 0.59 | 0.68 | 0.81 |
| 5                | 566   | 7.5       | 0.34             | 0.42 | 0.47 | 0.5  | 0.58 | 0.65 | 0.68 |
| 6                | 546   | 15        | 0.6              | 0.75 | 0.86 | 0.94 | 1    | 1.15 | 1.3  |
| 7                | 647   | 15        | 0.56             | 0.65 | 0.76 | 0.85 | 0.94 | 1.07 | 1.16 |
| 8                | 536   | 15        | 0.48             | 0.58 | 0.68 | 0.77 | 0.83 | 1    | 1.03 |
| 9                | 476   | 15        | 0.44             | 0.54 | 0.64 | 0.71 | 0.78 | 0.88 | 0.94 |
| 10               | 529   | 15        | 0.38             | 0.5  | 0.59 | 0.65 | 0.71 | 0.79 | 0.84 |
| 11               | 489   | 15        | 0.36             | 0.43 | 0.52 | 0.6  | 0.65 | 0.75 | 0.77 |
| 12               | 523   | 15        | 0.33             | 0.38 | 0.47 | 0.54 | 0.6  | 0.66 | 0.71 |
| 13               | 504   | 15        | 0.31             | 0.33 | 0.4  | 0.47 | 0.54 | 0.6  | 0.65 |
| 14               | 472   | 15        | 0.28             | 0.31 | 0.36 | 0.41 | 0.47 | 0.56 | 0.6  |
| 15†              | 1209  | 30        | 0.52             | 0.56 | 0.63 | 0.69 | 0.77 | 0.91 | 1.11 |
| 16               | 1197  | 30        | 0.48             | 0.54 | 0.6  | 0.65 | 0.71 | 0.82 | 1    |
| 17               | 1180  | 30        | 0.47             | 0.52 | 0.58 | 0.64 | 0.7  | 0.8  | 1    |
| ≥18              | 33800 | 30        | 0.35             | 0.44 | 0.52 | 0.58 | 0.65 | 0.75 | 1.07 |

\* Patients < 1 years of age in the data base included data on patients between 6 and 11 months.

† According to the weight age relationship, individuals aged 15 fell within the 15 mg weight and but their calculated mg/kg daily dose was low: 0.26, 0.28, 0.31, 0.34, 0.38, 0.45 and 0.56.
